# Supplementary material for: Reversible off and on switching of prion infectivity via removing and reinstalling prion sialylation
Source: PubMed Central journal article supplement (PMC5017131; doi:10.1038/srep33119), 2016-09-09

## Supplementary Information

### Reversible off and on switching of prion infectivity via removing and reinstalling prion sialylation

**Elizaveta Katorcha<sup>1,2</sup>, Martin L. Daus<sup>3</sup>, Nuria Gonzalez-Montalban<sup>1,2</sup>, Natallia Makarava<sup>1,2</sup>, Peter Lasch<sup>3</sup>, Michael Beekes<sup>3</sup>, Ilia V. Baskakov<sup>1,2#</sup>**

<sup>1</sup> Center for Biomedical Engineering and Technology, University of Maryland School of Medicine, Baltimore, Maryland, 21201 United States of America, <sup>2</sup> Department of Anatomy and Neurobiology, University of Maryland School of Medicine, Baltimore, Maryland, 21201 United States of America, <sup>3</sup> Centre for Biological Threats and Special Pathogens, Robert Koch-Institute, 13353 Berlin, Germany

**Supplementary Figure 1. (A)** Western blot of PK-treated SSLOW brain material serially diluted 10<sup>2</sup>-, 10<sup>3</sup>-, or 10<sup>4</sup>-fold, and PK-treated PMCAb-derived SSLOW material that was not diluted or diluted 10-fold. **(B)** Western blot of non-diluted PMCAb-, dsPMCAb and rsPMCAb-derived SSLOW material. Blots were stained with 3F4 antibody.

# Supplementary Figure 1

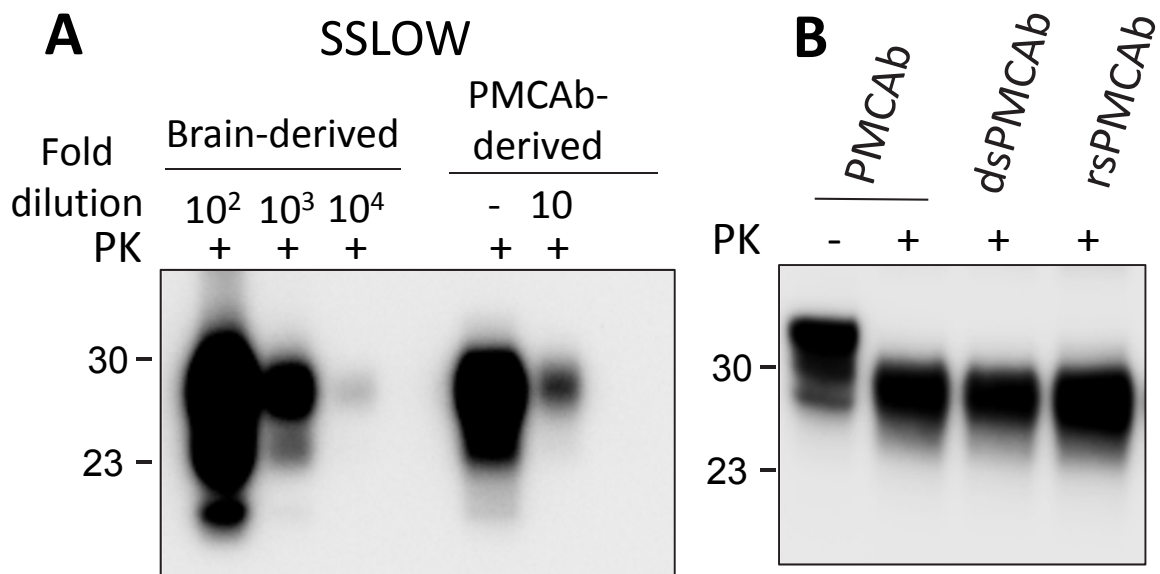

Supplement: srep33119-s1.pdf [file srep33119-s1.pdf]
